# Supplementary material for: Rapid Replacement of Acinetobacter baumannii Strains Accompanied by Changes in Lipooligosaccharide Loci and Resistance Gene Repertoire
Source: PubMed Central journal article supplement (PMC6437055; doi:10.1128/mbio.00356-19), 2019-03-26
Supplement: mBio.00356-19-sf002.pdf [file mBio.00356-19-sf002.pdf]

Tree scale: 0.01

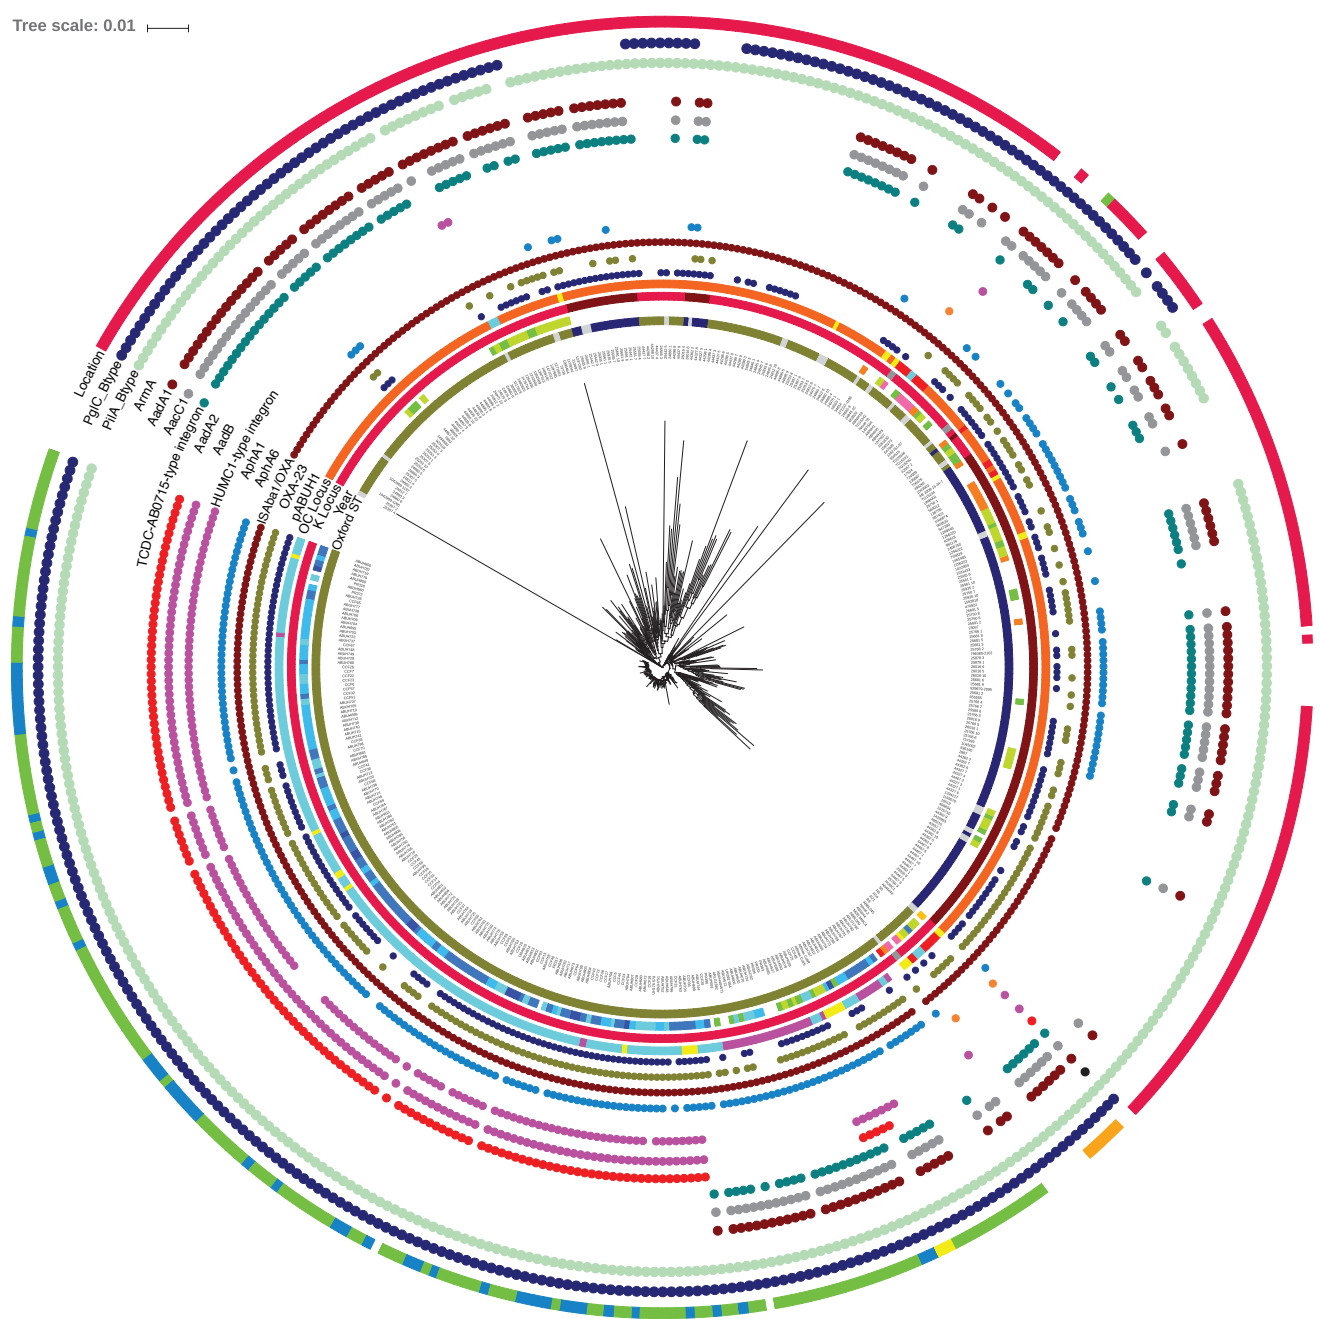

| Oxford MLST |       |
|-------------|-------|
| Blue        | ST208 |
| Olive       | ST281 |
| Dark Blue   | ST349 |
| Orange      | ST350 |
| Light Blue  | ST417 |
| Grey        | Other |

| Isolation Year |       |
|----------------|-------|
| Red            | <2007 |
| Pink           | 2007  |
| Orange         | 2008  |
| Yellow         | 2009  |
| Light Green    | 2010  |
| Green          | 2011  |
| Light Blue     | 2012  |
| Blue           | 2013  |
| Dark Blue      | 2014  |
| Dark Blue      | 2015  |
| Dark Blue      | 2016  |

| K Locus      |       |
|--------------|-------|
| Teal         | KL2   |
| Brown        | KL13  |
| Red          | KL22  |
| Light Purple | KL33  |
| Dark Blue    | KL42  |
| Grey         | Other |

| OC Locus   |                           |
|------------|---------------------------|
| Red        | OCL3                      |
| Orange     | OCL3_ISAba13+del6770-7948 |
| Light Blue | OCL3_ISAba13@7948         |
| Purple     | OCL3_ISAba13+del7142-7948 |
| Yellow     | OCL3-other_variant        |
| Dark Blue  | OCL1                      |

| Location    |        |
|-------------|--------|
| Light Green | OH A   |
| Blue        | OH B   |
| Red         | MD     |
| Orange      | PA     |
| Yellow      | France |
