# Supplementary material for: Rapid Replacement of Acinetobacter baumannii Strains Accompanied by Changes in Lipooligosaccharide Loci and Resistance Gene Repertoire
Source: PubMed Central journal article supplement (PMC6437055; doi:10.1128/mbio.00356-19), 2019-03-26

(A)

Tree scale: 1

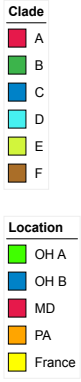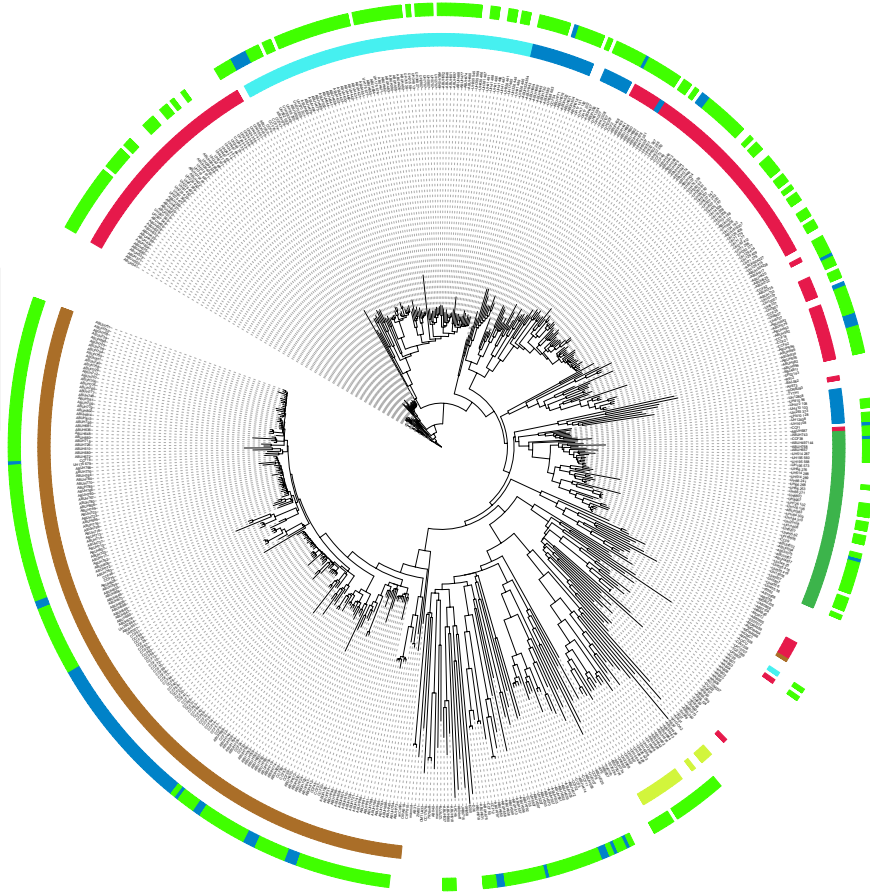

(B)

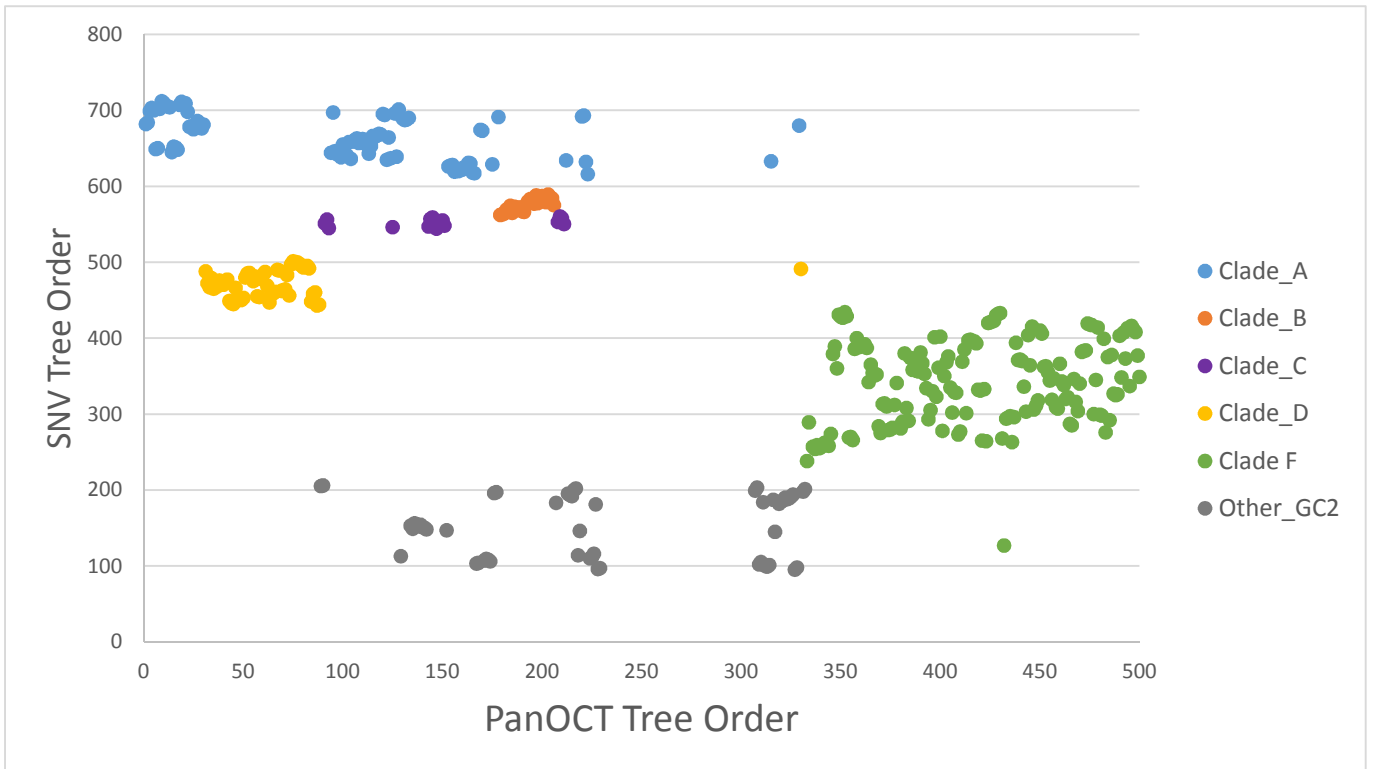

Supplement: mBio.00356-19-sf003.pdf [file mBio.00356-19-sf003.pdf]
